# Supplementary material for: How to reduce sitting time? A review of behaviour change strategies used in sedentary behaviour reduction interventions among adults
Source: PubMed Central journal article supplement (PMC4743603; doi:10.1080/17437199.2015.1082146), 2015-09-16
Supplement: rhpr_a_1082146_sm1770.pdf [file rhpr_a_1082146_sm1770.pdf]

**Supplemental Table 4.** Characteristics of worksite-based interventions, by intervention promise.

| <i>Characteristics</i>                                              | <i>Interventions</i>              |                                    |                                  |                         | <i>Promise ratio for intervention functions / behaviour change techniques *</i> |
|---------------------------------------------------------------------|-----------------------------------|------------------------------------|----------------------------------|-------------------------|---------------------------------------------------------------------------------|
|                                                                     | <i>Very promising<br/>(n = 7)</i> | <i>Quite promising<br/>(n = 5)</i> | <i>Non-promising<br/>(n = 8)</i> | <i>All<br/>(n = 20)</i> |                                                                                 |
| <b><i>Primary behaviour change aim</i></b>                          |                                   |                                    |                                  |                         |                                                                                 |
| To reduce sedentary behaviour                                       | 4                                 | 1                                  | 1                                | 6                       |                                                                                 |
| Joint: To reduce sedentary behaviour and increase physical activity | 1                                 | 0                                  | 0                                | 1                       |                                                                                 |
| To increase physical activity                                       | 1                                 | 4                                  | 6                                | 11                      |                                                                                 |
| Other                                                               | 1                                 | 0                                  | 1                                | 2                       |                                                                                 |
| <b><i>Intervention functions</i></b>                                |                                   |                                    |                                  |                         |                                                                                 |
| <b>Education</b>                                                    | <b>2</b>                          | <b>2</b>                           | <b>1</b>                         | <b>5</b>                | <b>4.0</b>                                                                      |
| Persuasion                                                          | 1                                 | 0                                  | 0                                | 1                       | -                                                                               |
| Incentivisation                                                     | 1                                 | 0                                  | 0                                | 1                       | -                                                                               |
| Training                                                            | 1                                 | 0                                  | 0                                | 1                       | -                                                                               |
| <b>Environmental restructuring</b>                                  | <b>5</b>                          | <b>1</b>                           | <b>0</b>                         | <b>6</b>                | -                                                                               |
| Modelling                                                           | 1                                 | 0                                  | 0                                | 1                       | -                                                                               |
| Enablement                                                          | 6                                 | 4                                  | 6                                | 16                      | 1.7                                                                             |
| <b><i>Behaviour change techniques</i></b>                           |                                   |                                    |                                  |                         |                                                                                 |
| Goal setting (behaviour)                                            | 4                                 | 4                                  | 5                                | 13                      | 1.6                                                                             |
| <b>Problem solving</b>                                              | <b>2</b>                          | <b>2</b>                           | <b>0</b>                         | <b>4</b>                | -                                                                               |
| Goal setting (outcome)                                              | 2                                 | 0                                  | 2                                | 4                       | 1.0                                                                             |
| Action planning                                                     | 3                                 | 2                                  | 3                                | 8                       | 1.7                                                                             |
| <b>Review behavioural goals</b>                                     | <b>1</b>                          | <b>3</b>                           | <b>2</b>                         | <b>6</b>                | <b>2.0</b>                                                                      |
| <b>Discrepancy between current behaviour and goal</b>               | <b>2</b>                          | <b>0</b>                           | <b>0</b>                         | <b>2</b>                | -                                                                               |
| Review outcome goals                                                | 1                                 | 0                                  | 0                                | 1                       | -                                                                               |
| <b>Feedback on behaviour</b>                                        | <b>2</b>                          | <b>0</b>                           | <b>0</b>                         | <b>2</b>                | -                                                                               |

|                                                  |          |          |          |           |            |
|--------------------------------------------------|----------|----------|----------|-----------|------------|
| <b>Self-monitoring (behaviour)</b>               | <b>4</b> | <b>3</b> | <b>2</b> | <b>9</b>  | <b>3.5</b> |
| Self-monitoring (outcome)                        | 1        | 0        | 2        | 3         | 0.5        |
| Feedback on outcomes                             | 0        | 1        | 0        | 1         | -          |
| Social support (unspecified)                     | 3        | 3        | 4        | 10        | 1.5        |
| <b>Social support (practical)</b>                | <b>2</b> | <b>0</b> | <b>0</b> | <b>2</b>  | <b>-</b>   |
| <b>Instruction on how to perform behaviour</b>   | <b>4</b> | <b>3</b> | <b>3</b> | <b>10</b> | <b>2.3</b> |
| <b>Information on health consequences</b>        | <b>2</b> | <b>2</b> | <b>2</b> | <b>6</b>  | <b>2.0</b> |
| Information on social and emotional consequences | 1        | 0        | 0        | 1         | -          |
| <b>Social comparison</b>                         | <b>1</b> | <b>1</b> | <b>0</b> | <b>2</b>  | <b>-</b>   |
| Prompts / cues                                   | 2        | 1        | 2        | 5         | 1.5        |
| <b>Behavioural practice / rehearsal</b>          | <b>2</b> | <b>0</b> | <b>0</b> | <b>2</b>  | <b>-</b>   |
| <b>Behaviour substitution</b>                    | <b>3</b> | <b>1</b> | <b>2</b> | <b>6</b>  | <b>2.0</b> |
| Habit formation                                  | 1        | 0        | 0        | 1         | -          |
| Graded tasks                                     | 1        | 0        | 2        | 3         | 0.5        |
| Pros and cons                                    | 1        | 0        | 0        | 1         | -          |
| Material incentive for behaviour                 | 1        | 0        | 0        | 1         | -          |
| Material reward for behaviour                    | 1        | 0        | 0        | 1         | -          |
| <b>Restructuring the physical environment</b>    | <b>4</b> | <b>1</b> | <b>0</b> | <b>5</b>  | <b>-</b>   |
| <b>Restructuring the social environment</b>      | <b>3</b> | <b>0</b> | <b>0</b> | <b>3</b>  | <b>-</b>   |
| <b>Adding objects to the environment</b>         | <b>6</b> | <b>1</b> | <b>2</b> | <b>9</b>  | <b>3.5</b> |

\* Promise ratio denotes the number of very or quite-promising interventions in which an intervention function or behaviour change technique featured, divided by the number of non-promising interventions in which it featured. Promise ratios only calculable for functions or techniques used in both promising and non-promising interventions. Rows in bold denote functions or techniques associated with a promise ratio of 2 or above, or used exclusively in promising interventions, and which featured in at least two interventions.
