# Supplementary material for: How to reduce sitting time? A review of behaviour change strategies used in sedentary behaviour reduction interventions among adults
Source: PubMed Central journal article supplement (PMC4743603; doi:10.1080/17437199.2015.1082146), 2015-09-16
Supplement: rhpr_a_1082146_sm1780.pdf [file rhpr_a_1082146_sm1780.pdf]

**Supplemental Table 1.** Search strategy developed in Ovid, used to concurrently search Embase, Medline, PsycInfo, and PsycArticles

| <i>Search step</i> | <i>Search term</i>                                                                                                                                                                                                                                                                                                                            | <i>Fields searched</i>                                                        | <i>Comments/justification of search at each step</i>                                                                                               |
|--------------------|-----------------------------------------------------------------------------------------------------------------------------------------------------------------------------------------------------------------------------------------------------------------------------------------------------------------------------------------------|-------------------------------------------------------------------------------|----------------------------------------------------------------------------------------------------------------------------------------------------|
| #1                 | (reduc* or decreas* or discourag* or lessen* or chang* or modif* or alter* or improv*) adj2 (sitting or seated or sedentary or inactiv* or TV or television or screen or internet or computer)                                                                                                                                                | Title OR abstract OR keywords                                                 | Focuses on reducing sedentary behaviour                                                                                                            |
| #2                 | (promot* or uptake or encourag* or increas* or start or chang* or modif* or alter* or improv*) adj ((physical* adj activ*) or exercis* or walk* or fitness or sport or stand*)                                                                                                                                                                | Title OR abstract OR keywords                                                 | Focuses on increasing physical activity                                                                                                            |
| #3                 | #1 OR #2                                                                                                                                                                                                                                                                                                                                      |                                                                               | Combines steps 1 and 2: reduction of sedentary behaviour or increase in physical activity                                                          |
| #4                 | (sitting or seated or sedentary or inactiv* or TV or television or screen or internet or computer)                                                                                                                                                                                                                                            | Title OR abstract OR keywords                                                 | Focuses on sedentary behaviour                                                                                                                     |
| #5                 | #3 AND #4                                                                                                                                                                                                                                                                                                                                     |                                                                               | Combines steps 3 and 4: ensures studies on decreasing sedentary behaviour or increasing physical activity include a measure of sedentary behaviour |
| #6                 | (random* adj control* adj (trial OR study)) OR (clinical adj trial) OR (compar* adj (group OR study OR trial)) OR (control* adj (group OR study OR trial)) OR (match* adj (group OR study OR trial)) OR (random* adj assign*)                                                                                                                 | Title OR abstract OR keywords OR methodology                                  | Focuses on intervention evaluation study designs                                                                                                   |
| #7                 | (adult* not child* not teenage* not adolescen* NOT (strok* OR pregnan* OR osteopor* OR COPD OR (chronic adj obstructive) OR asthma OR (back adj pain) OR angina OR (heart adj disease) OR (heart adj failure) OR cancer OR psychiatr* OR (cerebral adj palsy) OR arthrit* OR rheumat* OR fibromyalgi* OR (nursing adj home) OR rehabilitat*)) | Title OR abstract OR keywords OR methodology OR age group OR population group | Focuses on ineligible participant groups                                                                                                           |

|     |                                   |  |                                                                                                                                      |
|-----|-----------------------------------|--|--------------------------------------------------------------------------------------------------------------------------------------|
| #8  | #5 AND #6 AND #7                  |  | Combines steps 5-7: specifies sedentary behaviour interventions, using intervention trial designs, excluding ineligible participants |
| #9  | Limit to: English language, human |  | Limits results to publications in English, among humans                                                                              |
| #10 | Remove duplicates                 |  | Deduplicates results                                                                                                                 |
